# Supplementary material
Source: PubMed Central journal article supplement (PMC10684295)
Supplement: fcad299_supplementary_data.pdf [file fcad299_supplementary_data.pdf]

## Supplementary data

**Table 1:**

Admission notes from Paediatric Intensive Care Admissions amongst cohort of Congenital Myasthenic Syndrome Patients

| ID    | Age at Admission (years) | Genotype | Summary of Admission                                                                                                                       |
|-------|--------------------------|----------|--------------------------------------------------------------------------------------------------------------------------------------------|
| 4.00  | 1.42                     | COLQ     | Resp acidosis. Intubated                                                                                                                   |
| 4.00  | 1.25                     | COLQ     | Resp acidosis. Intubated                                                                                                                   |
| 4.00  | 0.42                     | COLQ     | Resp illness and seizure at home, admitted to Royal London PICU requiring ventilation                                                      |
| 5.00  | 2.58                     | COLQ     | Rapid onset of breathing difficulty. Chest infection, ventilated for two days in PICU                                                      |
| 8.00  | 1.25                     | COL13A1  | Pneumonia and severe resp failure. Admitted for 3 days                                                                                     |
| 8.00  | 0.33                     | COL13A1  | Admitted for chest infection and required ventilation                                                                                      |
| 9.00  | 0.92                     | COLQ     | May be more in the period Feb-July 2014. Sometimes NIV used rather than PICU admissions. Confident in these 3 admissions                   |
| 9.00  | 0.25                     | COLQ     | RSV associated (invasive vent)                                                                                                             |
| 9.00  | 0.00                     | COLQ     | Brief period of invasive ventilation. Birmingham                                                                                           |
| 14.00 | 2.50                     | COLQ     | Required ventilation. Fever associated. .5yrs old                                                                                          |
| 14.00 | 1.50                     | COLQ     | Required ventilation. Fever associated. 1.5yrs old                                                                                         |
| 14.00 | 0.58                     | COLQ     | 6 months old Status Epilepticus associated with resp tract infection. Last seizure Nov 2011. Persistent recurrent resp infections reported |
| 15.00 | 0.00                     | CHRNA3   | 9 days ventilated                                                                                                                          |
| 16.00 | 2.25                     | DOK7     | 1 week                                                                                                                                     |
| 16.00 | 2.00                     | DOK7     | Throat infection -> no intubation. 48hr ventilation                                                                                        |
| 16.00 | 1.67                     | DOK7     | Resuscitation with Bagging in A&E after period of coughing                                                                                 |
| 16.00 | 1.50                     | DOK7     | Cold -> chest infection -> George's                                                                                                        |
| 16.00 | 1.33                     | DOK7     | rsv onset                                                                                                                                  |
| 16.00 | 1.17                     | DOK7     | Given Azithromycin in a chest infection -> deteriorated, cyanosis, BiPaP full time no intubation                                           |
| 16.00 | 0.75                     | DOK7     | Resp complicated by parainfluenza                                                                                                          |
| 16.00 | 0.33                     | DOK7     | Repeated relapse and intubations. 5 crises over the course of a week at St. George's                                                       |
| 16.00 | 0.33                     | DOK7     | Repeated relapse and intubations. 5 crises over the course of a week at St. George's                                                       |
| 16.00 | 0.33                     | DOK7     | Repeated relapse and intubations. 5 crises over the course of a week at St. George's                                                       |
| 16.00 | 0.33                     | DOK7     | Repeated relapse and intubations. 5 crises over the course of a week at St. George's                                                       |
| 16.00 | 0.33                     | DOK7     | Repeated relapse and intubations. 5 crises over the course of a week at St. George's                                                       |
| 16.00 | 0.08                     | DOK7     | Required intubation                                                                                                                        |

|       |       |              |                                                                                                                  |
|-------|-------|--------------|------------------------------------------------------------------------------------------------------------------|
| 18.00 | 3.42  | DOK7         | Low oxygen sats, cyanosed. Transferred from secondary care                                                       |
| 18.00 | 0.50  | DOK7         | Presented with stridor and resp difficulties                                                                     |
| 18.00 | 0.25  | DOK7         | CPAP Dependent, required intubation                                                                              |
| 19.00 | 2.08  | CHRNE<br>FCS | Extubated under NIV                                                                                              |
| 19.00 | 1.08  | CHRNE<br>FCS | Resp deterioration                                                                                               |
| 19.00 | 0.92  | CHRNE<br>FCS | Bromptom. Resp deterioration                                                                                     |
| 19.00 | 0.25  | CHRNE<br>FCS | Cardiorespiratory arrest                                                                                         |
| 26.00 | 0.25  | RAPSN        | Intubation for intercurrent infections (bronchiolitis) and weaned onto NIV                                       |
| 32.00 | 11.50 | COLQ         | Resp deterioration after a period of resp distress (no temp rise either). Extubated the day after and put on NIV |
| 32.00 | 5.08  | COLQ         | Resp arrest requiring intubation and ventilation on PICU                                                         |
| 32.00 | 0.50  | COLQ         | Similar to first episode with vomiting                                                                           |
| 32.00 | 0.33  | COLQ         | Resp crises starting with upper resp tract symptoms                                                              |
| 34.00 | 17.00 | RAPSN        | HDU in 2013                                                                                                      |
| 35.00 | 0.83  | CHAT         | PICU aged 10 months for prolonged apnoea                                                                         |
| 38.00 | 0.00  | CHAT         | NICU from birth, stepped down Apr 2020                                                                           |

**Table 2a:**

Summary of Predicted Forced Vital Capacity (FVC%) and Predicted Peak Expiratory Flow (PEF%) by Congenital Myasthenic Syndrome (CMS) genotype.

**Table 2b:**

Raw data used to calculate Predicted Peak Expiratory Flow (PEF%) on spirometry when compared to mean predicted values of the European Respiratory Study (ERS) for PEF.

Raw data used to calculate Percentage of forced vital capacity (FVC%) on spirometry when compared to the 5<sup>th</sup> percentile of Global Lung Function Initiative (GLI) reference equations for spirometry for FVC.

| ID | Genotype | FVC%  | PEF%  | Age at Study |
|----|----------|-------|-------|--------------|
| 10 | COLQ     | 64.12 | 47.36 | 14.33        |
| 10 | COLQ     | 57.27 | 34.59 | 15.42        |
| 10 | COLQ     | 57.27 | 34.59 | 15.42        |
| 10 | COLQ     | 57.69 | 54.39 | 15.92        |
| 10 | COLQ     | 57.69 | 54.39 | 15.92        |
| 11 | COL13A1  | 67.94 | 61.52 | 13.00        |
| 11 | COL13A1  | 69.87 | 63.05 | 13.58        |
| 11 | COL13A1  | 59.23 | 75.32 | 14.75        |
| 11 | COL13A1  | 68.21 | 83.90 | 15.75        |
| 31 | RAPSN    | 58.34 | 64.00 | 14.17        |

|    |        |        |        |       |
|----|--------|--------|--------|-------|
| 31 | RAPSN  | 47.14  | 51.65  | 15.33 |
| 31 | RAPSN  | 41.23  | 67.97  | 16.75 |
| 6  | COLQ   | 105.33 | 79.25  | 9.50  |
| 6  | COLQ   | 105.33 | 79.25  | 9.50  |
| 6  | COLQ   | 94.37  | 96.62  | 10.33 |
| 6  | COLQ   | 94.37  | 96.62  | 10.33 |
| 6  | COLQ   | 94.37  | 96.62  | 10.33 |
| 6  | COLQ   | 94.37  | 96.62  | 10.33 |
| 6  | COLQ   | 86.38  | 78.80  | 11.42 |
| 6  | COLQ   | 86.38  | 78.80  | 11.42 |
| 6  | COLQ   | 86.38  | 78.80  | 11.42 |
| 6  | COLQ   | 86.38  | 78.80  | 11.42 |
| 6  | COLQ   | 83.83  | 90.99  | 12.83 |
| 12 | CHRNA1 | 103.33 | 91.86  | 7.83  |
| 12 | CHRNA1 | 88.57  | 74.64  | 9.25  |
| 12 | CHRNA1 | 91.30  | 59.22  | 9.25  |
| 17 | DOK7   | 72.62  | 39.44  | 11.33 |
| 17 | DOK7   | 56.41  | 46.44  | 13.08 |
| 17 | DOK7   | 56.41  | 46.44  | 13.08 |
| 17 | DOK7   | 55.15  | 43.93  | 13.50 |
| 17 | DOK7   | 54.51  | 45.37  | 15.25 |
| 20 | DOK7   | 111.20 | 110.01 | 15.67 |
| 20 | DOK7   | 112.15 | 99.69  | 16.83 |
| 21 | DOK7   | 81.01  | 92.56  | 8.33  |
| 21 | DOK7   | 82.83  | 88.70  | 8.33  |
| 21 | DOK7   | 93.90  | 104.89 | 10.33 |
| 21 | DOK7   | 83.51  | 108.77 | 14.67 |
| 21 | DOK7   | 88.23  | 115.79 | 16.33 |
| 21 | DOK7   | 81.08  | 105.70 | 17.17 |
| 25 | COLQ   | #NULL! | #NULL! | 11.46 |
| 25 | COLQ   | #NULL! | #NULL! | 12.57 |
| 25 | COLQ   | 75.00  | #NULL! | 14.58 |
| 29 | RAPSN  | 91.12  | 102.60 | 14.83 |
| 29 | RAPSN  | 96.14  | 116.77 | 15.33 |
| 29 | RAPSN  | 95.16  | 113.80 | 15.67 |
| 29 | RAPSN  | 93.44  | 101.17 | 8.50  |
| 29 | RAPSN  | 91.34  | 107.97 | 10.75 |
| 29 | RAPSN  | 91.34  | 107.97 | 10.75 |
| 29 | RAPSN  | 91.34  | 107.97 | 10.75 |
| 29 | RAPSN  | 91.34  | 107.97 | 10.75 |
| 29 | RAPSN  | 95.04  | 94.47  | 11.25 |
| 29 | RAPSN  | 95.04  | 94.47  | 11.25 |
| 29 | RAPSN  | 95.04  | 94.47  | 11.25 |
| 29 | RAPSN  | 95.04  | 94.47  | 11.25 |
| 29 | RAPSN  | 95.50  | 105.48 | 11.25 |
| 29 | RAPSN  | 95.50  | 105.48 | 11.25 |

|    |           |        |        |       |
|----|-----------|--------|--------|-------|
| 29 | RAPSN     | 95.50  | 105.48 | 11.25 |
| 29 | RAPSN     | 95.50  | 105.48 | 11.25 |
| 29 | RAPSN     | 100.76 | 104.26 | 11.67 |
| 29 | RAPSN     | 100.76 | 104.26 | 11.67 |
| 29 | RAPSN     | 97.81  | 105.02 | 12.25 |
| 29 | RAPSN     | 97.81  | 105.02 | 12.25 |
| 29 | RAPSN     | 94.24  | 102.24 | 13.25 |
| 29 | RAPSN     | 90.26  | 115.83 | 13.83 |
| 31 | RAPSN     | 39.97  | 72.07  | 17.17 |
| 32 | COLQ      | 72.64  | 49.98  | 14.58 |
| 32 | COLQ      | 76.49  | 46.73  | 15.08 |
| 32 | COLQ      | 76.49  | 46.73  | 15.08 |
| 32 | COLQ      | 80.94  | 49.18  | 15.50 |
| 32 | COLQ      | 80.94  | 49.18  | 15.50 |
| 32 | COLQ      | 82.53  | 48.28  | 15.92 |
| 32 | COLQ      | 82.53  | 48.28  | 15.92 |
| 32 | COLQ      | 76.45  | 47.57  | 16.50 |
| 33 | DOK7      | 57.61  | 42.11  | 17.17 |
| 33 | DOK7      | 49.83  | 52.83  | 17.33 |
| 33 | DOK7      | 50.78  | 37.45  | 13.67 |
| 33 | DOK7      | 62.71  | 35.52  | 14.67 |
| 33 | DOK7      | 53.80  | 40.36  | 15.58 |
| 33 | DOK7      | 55.89  | 43.47  | 16.83 |
| 4  | COLQ      | #NULL! | 89.14  | 3.92  |
| 4  | COLQ      | #NULL! | 88.16  | 4.67  |
| 4  | COLQ      | 79.44  | 96.92  | 5.75  |
| 5  | COLQ      | 71.30  | 59.58  | 5.25  |
| 5  | COLQ      | 86.26  | 71.24  | 5.75  |
| 5  | COLQ      | 97.48  | 69.51  | 6.50  |
| 5  | COLQ      | 92.23  | 70.19  | 7.58  |
| 5  | COLQ      | 92.23  | 70.19  | 7.58  |
| 14 | COLQ      | #NULL! | 70.01  | 4.25  |
| 14 | COLQ      | #NULL! | 98.37  | 4.42  |
| 14 | COLQ      | 71.60  | 68.65  | 5.25  |
| 14 | COLQ      | 89.31  | 76.73  | 6.67  |
| 14 | COLQ      | 75.83  | 65.32  | 7.17  |
| 14 | COLQ      | 83.92  | 87.71  | 7.92  |
| 14 | COLQ      | 85.49  | 85.67  | 9.00  |
| 18 | DOK7      | 35.28  | 35.76  | 10.08 |
| 19 | CHRNE FCS | #NULL! | #NULL! | 3.75  |
| 19 | CHRNE FCS | 74.08  | 73.22  | 6.67  |
| 19 | CHRNE FCS | 60.80  | 62.82  | 7.42  |
| 19 | CHRNE FCS | 65.29  | 58.61  | 8.50  |
| 19 | CHRNE FCS | 56.09  | 81.89  | 10.17 |
| 19 | CHRNE FCS | 67.70  | 87.80  | 10.50 |
| 19 | CHRNE FCS | 67.70  | 87.80  | 10.50 |

|    |       |        |       |       |
|----|-------|--------|-------|-------|
| 23 | DOK7  | 70.24  | 56.29 | 5.67  |
| 23 | DOK7  | 86.09  | 58.43 | 7.67  |
| 23 | DOK7  | 80.38  | 47.66 | 11.58 |
| 23 | DOK7  | 80.38  | 47.66 | 11.58 |
| 23 | DOK7  | 64.95  | 50.79 | 16.08 |
| 28 | DOK7  | 62.90  | 45.98 | 8.42  |
| 28 | DOK7  | 70.65  | 51.78 | 8.42  |
| 28 | DOK7  | 88.19  | 70.52 | 8.67  |
| 28 | DOK7  | 90.36  | 65.52 | 8.67  |
| 28 | DOK7  | 91.81  | 55.96 | 8.67  |
| 28 | DOK7  | 95.43  | 31.52 | 9.25  |
| 28 | DOK7  | 97.17  | 45.78 | 9.67  |
| 28 | DOK7  | 91.89  | 63.73 | 9.75  |
| 28 | DOK7  | 93.08  | 40.25 | 10.17 |
| 28 | DOK7  | 95.16  | 47.41 | 10.17 |
| 28 | DOK7  | 88.68  | 40.71 | 10.67 |
| 28 | DOK7  | 93.27  | 42.40 | 10.67 |
| 28 | DOK7  | 97.11  | 52.67 | 10.67 |
| 28 | DOK7  | 86.34  | 56.22 | 14.25 |
| 28 | DOK7  | 78.91  | 57.93 | 15.50 |
| 28 | DOK7  | 78.91  | 57.93 | 15.50 |
| 28 | DOK7  | 81.62  | 65.26 | 16.17 |
| 28 | DOK7  | 81.62  | 65.26 | 16.17 |
| 28 | DOK7  | 84.94  | 61.35 | 16.17 |
| 28 | DOK7  | 84.94  | 61.35 | 16.17 |
| 13 | CHRNE | 64.08  | 48.34 | 9.75  |
| 13 | CHRNE | 64.08  | 48.34 | 9.75  |
| 13 | CHRNE | 70.59  | 57.50 | 10.17 |
| 13 | CHRNE | 70.59  | 57.50 | 10.17 |
| 13 | CHRNE | 70.59  | 57.50 | 10.17 |
| 13 | CHRNE | 70.59  | 57.50 | 10.17 |
| 13 | CHRNE | 74.19  | 54.24 | 11.00 |
| 13 | CHRNE | 74.19  | 54.24 | 11.00 |
| 13 | CHRNE | 67.42  | 56.69 | 11.67 |
| 13 | CHRNE | 76.91  | 73.14 | 12.33 |
| 13 | CHRNE | 70.17  | 80.66 | 14.17 |
| 16 | DOK7  | #NULL! | 53.10 | 5.75  |
| 22 | CHRNE | 92.52  | 57.59 | 7.58  |
| 22 | CHRNE | 86.65  | 74.93 | 10.08 |
| 22 | CHRNE | 81.91  | 68.97 | 11.25 |
| 22 | CHRNE | 81.06  | 68.78 | 12.42 |
| 24 | COLQ  | 86.10  | 53.77 | 11.42 |
| 26 | RAPSN | #NULL! | 59.90 | 6.67  |
| 26 | RAPSN | 91.68  | 78.70 | 7.25  |
| 26 | RAPSN | 98.26  | 76.17 | 8.25  |
| 26 | RAPSN | 82.10  | 63.97 | 9.33  |

|    |           |        |       |       |
|----|-----------|--------|-------|-------|
| 26 | RAPSN     | 87.59  | 88.13 | 13.08 |
| 26 | RAPSN     | 87.59  | 88.13 | 13.08 |
| 26 | RAPSN     | 92.63  | 95.04 | 14.00 |
| 26 | RAPSN     | 92.63  | 95.04 | 14.00 |
| 26 | RAPSN     | 90.25  | 84.15 | 12.25 |
| 26 | RAPSN     | 90.25  | 84.15 | 12.25 |
| 27 | RAPSN     | 94.84  | 65.70 | 7.83  |
| 27 | RAPSN     | 88.64  | 71.95 | 12.00 |
| 27 | RAPSN     | 88.64  | 71.95 | 12.00 |
| 27 | RAPSN     | 84.47  | 72.55 | 13.92 |
| 27 | RAPSN     | 81.60  | 75.00 | 14.92 |
| 27 | RAPSN     | 82.78  | 80.01 | 15.42 |
| 30 | CHRNA SCS | #NULL! | 69.89 | 4.50  |
| 30 | CHRNA SCS | 83.14  | 76.34 | 7.83  |
| 30 | CHRNA SCS | 83.65  | 63.78 | 8.75  |
| 30 | CHRNA SCS | 85.11  | 78.71 | 9.67  |

| Genotype | ID | Height (m) | Gender | Age (years) | FEV1  | FVC   | Reference FVC at GLI | PEF    | Reference PEF at ERS | FVC%   | PEF%  |
|----------|----|------------|--------|-------------|-------|-------|----------------------|--------|----------------------|--------|-------|
| COLQ     | 10 | 1.47       | Female | 14.33       | 1.429 | 1.526 | 2.38                 | 154.86 | 327.00               | 64.12  | 47.36 |
| COLQ     | 10 | 1.47       | Female | 15.42       | 1.155 | 1.363 | 2.38                 | 113.10 | 327.00               | 57.27  | 34.59 |
| COLQ     | 10 | 1.47       | Female | 15.42       | 1.155 | 1.363 | 2.38                 | 113.10 | 327.00               | 57.27  | 34.59 |
| COLQ     | 10 | 1.47       | Female | 15.92       | 1.330 | 1.373 | 2.38                 | 177.84 | 327.00               | 57.69  | 54.39 |
| COLQ     | 10 | 1.47       | Female | 15.92       | 1.330 | 1.373 | 2.38                 | 177.84 | 327.00               | 57.69  | 54.39 |
| COL13A2  | 11 | 1.39       | Male   | 13.00       | 1.399 | 1.617 | 2.38                 | 193.80 | 315.00               | 67.94  | 61.52 |
| COL13A2  | 11 | 1.41       | Male   | 13.58       | 1.289 | 1.663 | 2.38                 | 198.60 | 315.00               | 69.87  | 63.05 |
| COL13A2  | 11 | 1.42       | Male   | 14.75       | 1.426 | 1.617 | 2.73                 | 237.26 | 315.00               | 59.23  | 75.32 |
| COL13A2  | 11 | 1.45       | Male   | 15.75       | 1.501 | 1.862 | 2.73                 | 287.76 | 343.00               | 68.21  | 83.90 |
| RPSN     | 31 | 1.41       | Male   | 14.17       | 1.475 | 1.511 | 2.59                 | 201.60 | 315.00               | 58.34  | 64.00 |
| RPSN     | 31 | 1.55       | Male   | 15.33       | 1.450 | 1.565 | 3.32                 | 205.58 | 398.00               | 47.14  | 51.65 |
| RPSN     | 31 | 1.49       | Male   | 16.75       | 1.265 | 1.369 | 3.32                 | 252.15 | 371.00               | 41.23  | 67.97 |
| COLQ     | 6  | 1.39       | Female | 9.50        | 1.924 | 2.212 | 2.10                 | 239.34 | 302.00               | 105.33 | 79.25 |
| COLQ     | 6  | 1.39       | Female | 9.50        | 1.924 | 2.212 | 2.10                 | 239.34 | 302.00               | 105.33 | 79.25 |
| COLQ     | 6  | 1.44       | Female | 10.33       | 2.008 | 2.246 | 2.38                 | 315.96 | 327.00               | 94.37  | 96.62 |
| COLQ     | 6  | 1.44       | Female | 10.33       | 2.008 | 2.246 | 2.38                 | 315.96 | 327.00               | 94.37  | 96.62 |
| COLQ     | 6  | 1.44       | Female | 10.33       | 2.008 | 2.246 | 2.38                 | 315.96 | 327.00               | 94.37  | 96.62 |
| COLQ     | 6  | 1.44       | Female | 10.33       | 2.008 | 2.246 | 2.38                 | 315.96 | 327.00               | 94.37  | 96.62 |
| COLQ     | 6  | 1.51       | Female | 11.42       | 1.943 | 2.289 | 2.65                 | 276.60 | 351.00               | 86.38  | 78.80 |
| COLQ     | 6  | 1.51       | Female | 11.42       | 1.943 | 2.289 | 2.65                 | 276.60 | 351.00               | 86.38  | 78.80 |
| COLQ     | 6  | 1.51       | Female | 11.42       | 1.943 | 2.289 | 2.65                 | 276.60 | 351.00               | 86.38  | 78.80 |
| COLQ     | 6  | 1.51       | Female | 11.42       | 1.943 | 2.289 | 2.65                 | 276.60 | 351.00               | 86.38  | 78.80 |
| COLQ     | 6  | 1.51       | Female | 11.42       | 1.943 | 2.289 | 2.65                 | 276.60 | 351.00               | 86.38  | 78.80 |
| COLQ     | 6  | 1.59       | Female | 12.83       | 2.639 | 2.909 | 3.47                 | 363.06 | 399.00               | 83.83  | 90.99 |
| CHRNA1   | 12 | 1.16       | Female | 7.83        | 1.254 | 1.426 | 1.38                 | 166.26 | 181.00               | 103.33 | 91.86 |
| CHRNA1   | 12 | 1.23       | Female | 9.25        | 1.308 | 1.426 | 1.61                 | 171.66 | 230.00               | 88.57  | 74.64 |
| CHRNA1   | 12 | 1.23       | Female | 9.25        | 1.238 | 1.470 | 1.61                 | 136.20 | 230.00               | 91.30  | 59.22 |
| DOK7     | 17 | 1.38       | Female | 11.33       | 1.402 | 1.525 | 2.10                 | 119.10 | 302.00               | 72.62  | 39.44 |
| DOK7     | 17 | 1.49       | Female | 13.08       | 1.653 | 1.743 | 3.09                 | 163.01 | 351.00               | 56.41  | 46.44 |
| DOK7     | 17 | 1.49       | Female | 13.08       | 1.653 | 1.743 | 3.09                 | 163.01 | 351.00               | 56.41  | 46.44 |
| DOK7     | 17 | 1.52       | Female | 13.50       | 1.600 | 1.704 | 3.09                 | 154.18 | 351.00               | 55.15  | 43.93 |
| DOK7     | 17 | 1.66       | Female | 15.25       | 1.915 | 2.115 | 3.88                 | 192.36 | 424.00               | 54.51  | 45.37 |

|      |    |        |        |       |        |       |        |        |        |        |        |
|------|----|--------|--------|-------|--------|-------|--------|--------|--------|--------|--------|
| DOK7 | 20 | 1.62   | Male   | 15.67 | 3.989  | 4.181 | 3.76   | 468.66 | 426.00 | 111.20 | 110.01 |
| DOK7 | 20 | 1.62   | Male   | 16.83 | 3.808  | 4.217 | 3.76   | 424.70 | 426.00 | 112.15 | 99.69  |
| DOK7 | 21 | 1.23   | Female | 8.33  | 1.106  | 1.118 | 1.38   | 212.88 | 230.00 | 81.01  | 92.56  |
| DOK7 | 21 | 1.23   | Female | 8.33  | 1.125  | 1.143 | 1.38   | 204.00 | 230.00 | 82.83  | 88.70  |
| DOK7 | 21 | 1.33   | Female | 10.33 | 1.382  | 1.493 | 1.59   | 291.60 | 278.00 | 93.90  | 104.89 |
| DOK7 | 21 | 1.50   | Female | 14.67 | 2.053  | 2.213 | 2.65   | 381.78 | 351.00 | 83.51  | 108.77 |
| DOK7 | 21 | 1.51   | Female | 16.33 | 2.103  | 2.338 | 2.65   | 406.44 | 351.00 | 88.23  | 115.79 |
| DOK7 | 21 | 1.57   | Female | 17.17 | 2.168  | 2.408 | 2.97   | 396.36 | 375.00 | 81.08  | 105.70 |
| COLQ | 25 | #NULL! | Male   | 11.46 | 1.840  | 2.250 | #NULL! | #NULL! | #NULL! | #NULL! | #NULL! |
| COLQ | 25 | #NULL! | Male   | 12.57 | 1.770  | 2.040 | #NULL! | #NULL! | #NULL! | #NULL! | #NULL! |
| COLQ | 25 | 1.62   | Male   | 14.58 | #NULL! | 2.820 | 3.76   | #NULL! | 426.00 | 75.00  | #NULL! |
| RPSN | 29 | 1.59   | Female | 14.83 | 3.105  | 3.162 | 3.47   | 409.37 | 399.00 | 91.12  | 102.60 |
| RPSN | 29 | 1.60   | Female | 15.33 | 3.219  | 3.336 | 3.47   | 465.90 | 399.00 | 96.14  | 116.77 |
| RPSN | 29 | 1.60   | Female | 15.67 | 3.273  | 3.302 | 3.47   | 454.08 | 399.00 | 95.16  | 113.80 |
| RPSN | 29 | 1.28   | Female | 8.50  | 1.531  | 1.738 | 1.86   | 256.98 | 254.00 | 93.44  | 101.17 |
| RPSN | 29 | 1.42   | Female | 10.75 | 2.024  | 2.174 | 2.38   | 326.08 | 302.00 | 91.34  | 107.97 |
| RPSN | 29 | 1.42   | Female | 10.75 | 2.024  | 2.174 | 2.38   | 326.08 | 302.00 | 91.34  | 107.97 |
| RPSN | 29 | 1.42   | Female | 10.75 | 2.024  | 2.174 | 2.38   | 326.08 | 302.00 | 91.34  | 107.97 |
| RPSN | 29 | 1.42   | Female | 10.75 | 2.024  | 2.174 | 2.38   | 326.08 | 302.00 | 91.34  | 107.97 |
| RPSN | 29 | 1.44   | Female | 11.25 | 2.038  | 2.262 | 2.38   | 308.91 | 327.00 | 95.04  | 94.47  |
| RPSN | 29 | 1.44   | Female | 11.25 | 2.038  | 2.262 | 2.38   | 308.91 | 327.00 | 95.04  | 94.47  |
| RPSN | 29 | 1.44   | Female | 11.25 | 2.038  | 2.262 | 2.38   | 308.91 | 327.00 | 95.04  | 94.47  |
| RPSN | 29 | 1.44   | Female | 11.25 | 2.038  | 2.262 | 2.38   | 308.91 | 327.00 | 95.04  | 94.47  |
| RPSN | 29 | 1.44   | Female | 11.25 | 2.114  | 2.273 | 2.38   | 344.92 | 327.00 | 95.50  | 105.48 |
| RPSN | 29 | 1.44   | Female | 11.25 | 2.114  | 2.273 | 2.38   | 344.92 | 327.00 | 95.50  | 105.48 |
| RPSN | 29 | 1.44   | Female | 11.25 | 2.114  | 2.273 | 2.38   | 344.92 | 327.00 | 95.50  | 105.48 |
| RPSN | 29 | 1.44   | Female | 11.25 | 2.114  | 2.273 | 2.38   | 344.92 | 327.00 | 95.50  | 105.48 |
| RPSN | 29 | 1.47   | Female | 11.67 | 2.179  | 2.398 | 2.38   | 340.92 | 327.00 | 100.76 | 104.26 |
| RPSN | 29 | 1.47   | Female | 11.67 | 2.179  | 2.398 | 2.38   | 340.92 | 327.00 | 100.76 | 104.26 |
| RPSN | 29 | 1.51   | Female | 12.25 | 2.405  | 2.592 | 2.65   | 368.63 | 351.00 | 97.81  | 105.02 |



|      |    |      |        |       |       |       |        |        |        |        |        |
|------|----|------|--------|-------|-------|-------|--------|--------|--------|--------|--------|
| RPSN | 29 | 1.51 | Female | 12.25 | 2.405 | 2.592 | 2.65   | 368.63 | 351.00 | 97.81  | 105.02 |
| RPSN | 29 | 1.56 | Female | 13.25 | 2.801 | 2.912 | 3.09   | 383.40 | 375.00 | 94.24  | 102.24 |
| RPSN | 29 | 1.57 | Female | 13.83 | 2.970 | 3.132 | 3.47   | 434.37 | 375.00 | 90.26  | 115.83 |
| RPSN | 31 | 1.48 | Male   | 17.17 | 1.266 | 1.327 | 3.32   | 267.37 | 371.00 | 39.97  | 72.07  |
| COLQ | 32 | 1.51 | Female | 14.58 | 1.461 | 1.925 | 2.65   | 175.44 | 351.00 | 72.64  | 49.98  |
| COLQ | 32 | 1.51 | Female | 15.08 | 1.560 | 2.027 | 2.65   | 164.01 | 351.00 | 76.49  | 46.73  |
| COLQ | 32 | 1.51 | Female | 15.08 | 1.560 | 2.027 | 2.65   | 164.01 | 351.00 | 76.49  | 46.73  |
| COLQ | 32 | 1.52 | Female | 15.50 | 1.826 | 2.145 | 2.65   | 172.63 | 351.00 | 80.94  | 49.18  |
| COLQ | 32 | 1.52 | Female | 15.50 | 1.826 | 2.145 | 2.65   | 172.63 | 351.00 | 80.94  | 49.18  |
| COLQ | 32 | 1.52 | Female | 15.92 | 1.888 | 2.187 | 2.65   | 169.45 | 351.00 | 82.53  | 48.28  |
| COLQ | 32 | 1.52 | Female | 15.92 | 1.888 | 2.187 | 2.65   | 169.45 | 351.00 | 82.53  | 48.28  |
| COLQ | 32 | 1.52 | Female | 16.50 | 1.612 | 2.026 | 2.65   | 166.98 | 351.00 | 76.45  | 47.57  |
| DOK7 | 33 | 1.64 | Male   | 17.17 | 1.717 | 2.166 | 3.76   | 191.20 | 454.00 | 57.61  | 42.11  |
| DOK7 | 33 | 1.72 | Male   | 17.33 | 1.805 | 2.327 | 4.67   | 254.64 | 482.00 | 49.83  | 52.83  |
| DOK7 | 33 | 1.51 | Male   | 13.67 | 1.564 | 1.686 | 3.32   | 138.95 | 371.00 | 50.78  | 37.45  |
| DOK7 | 33 | 1.56 | Male   | 14.67 | 1.776 | 2.082 | 3.32   | 141.35 | 398.00 | 62.71  | 35.52  |
| DOK7 | 33 | 1.61 | Male   | 15.58 | 1.816 | 2.023 | 3.76   | 171.95 | 426.00 | 53.80  | 40.36  |
| DOK7 | 33 | 1.72 | Male   | 16.83 | 1.864 | 2.364 | 4.23   | 209.52 | 482.00 | 55.89  | 43.47  |
| COLQ | 4  | 1.07 | Male   | 3.92  | 0.813 | 0.849 | #NULL! | 106.08 | 119.00 | #NULL! | 89.14  |
| COLQ | 4  | 1.12 | Male   | 4.67  | 0.870 | 0.897 | #NULL! | 129.60 | 147.00 | #NULL! | 88.16  |
| COLQ | 4  | 1.20 | Male   | 5.75  | 1.133 | 1.144 | 1.44   | 196.74 | 203.00 | 79.44  | 96.92  |
| COLQ | 5  | 1.08 | Female | 5.25  | 0.820 | 0.820 | 1.15   | 93.54  | 157.00 | 71.30  | 59.58  |
| COLQ | 5  | 1.11 | Female | 5.75  | 0.943 | 0.992 | 1.15   | 111.84 | 157.00 | 86.26  | 71.24  |
| COLQ | 5  | 1.16 | Female | 6.50  | 1.048 | 1.121 | 1.15   | 125.82 | 181.00 | 97.48  | 69.51  |
| COLQ | 5  | 1.22 | Female | 7.58  | 1.286 | 1.365 | 1.48   | 143.88 | 205.00 | 92.23  | 70.19  |
| COLQ | 5  | 1.22 | Female | 7.58  | 1.286 | 1.365 | 1.48   | 143.88 | 205.00 | 92.23  | 70.19  |
| COLQ | 14 | 1.07 | Male   | 4.25  | 0.618 | 0.638 | #NULL! | 83.31  | 119.00 | #NULL! | 70.01  |
| COLQ | 14 | 1.09 | Male   | 4.42  | 0.640 | 0.662 | #NULL! | 144.60 | 147.00 | #NULL! | 98.37  |
| COLQ | 14 | 1.15 | Male   | 5.25  | 0.899 | 1.031 | 1.44   | 120.14 | 175.00 | 71.60  | 68.65  |
| COLQ | 14 | 1.24 | Male   | 6.67  | 1.198 | 1.286 | 1.44   | 177.24 | 231.00 | 89.31  | 76.73  |

|      |    |      |        |       |       |       |        |        |        |        |        |
|------|----|------|--------|-------|-------|-------|--------|--------|--------|--------|--------|
| COLQ | 14 | 1.28 | Male   | 7.17  | 1.248 | 1.274 | 1.68   | 150.90 | 231.00 | 75.83  | 65.32  |
| COLQ | 14 | 1.31 | Male   | 7.92  | 1.451 | 1.519 | 1.81   | 227.16 | 259.00 | 83.92  | 87.71  |
| COLQ | 14 | 1.37 | Male   | 9.00  | 1.693 | 1.761 | 2.06   | 245.88 | 287.00 | 85.49  | 85.67  |
| DOK7 | 18 | 1.32 | Female | 10.08 | 0.514 | 0.561 | 1.59   | 90.84  | 254.00 | 35.28  | 35.76  |
| FCS  | 19 | 0.93 | Female | 3.75  | 0.368 | 0.377 | #NULL! | 77.26  | #NULL! | #NULL! | #NULL! |
| FCS  | 19 | 1.13 | Female | 6.67  | 0.858 | 0.926 | 1.25   | 132.52 | 181.00 | 74.08  | 73.22  |
| FCS  | 19 | 1.13 | Female | 7.42  | 0.683 | 0.760 | 1.25   | 113.70 | 181.00 | 60.80  | 62.82  |
| FCS  | 19 | 1.16 | Female | 8.50  | 0.799 | 0.901 | 1.38   | 106.08 | 181.00 | 65.29  | 58.61  |
| FCS  | 19 | 1.22 | Female | 10.17 | 0.880 | 0.903 | 1.61   | 167.88 | 205.00 | 56.09  | 81.89  |
| FCS  | 19 | 1.22 | Female | 10.50 | 1.069 | 1.090 | 1.61   | 180.00 | 205.00 | 67.70  | 87.80  |
| FCS  | 19 | 1.22 | Female | 10.50 | 1.069 | 1.090 | 1.61   | 180.00 | 205.00 | 67.70  | 87.80  |
| DOK7 | 23 | 1.08 | Female | 5.67  | 0.818 | 0.878 | 1.25   | 88.38  | 157.00 | 70.24  | 56.29  |
| DOK7 | 23 | 1.22 | Female | 7.67  | 0.997 | 1.188 | 1.38   | 119.77 | 205.00 | 86.09  | 58.43  |
| DOK7 | 23 | 1.41 | Female | 11.58 | 1.361 | 1.688 | 2.10   | 143.93 | 302.00 | 80.38  | 47.66  |
| DOK7 | 23 | 1.41 | Female | 11.58 | 1.361 | 1.688 | 2.10   | 143.93 | 302.00 | 80.38  | 47.66  |
| DOK7 | 23 | 1.65 | Female | 16.08 | 1.944 | 2.520 | 3.88   | 215.34 | 424.00 | 64.95  | 50.79  |
| DOK7 | 28 | 1.21 | Female | 8.42  | 0.643 | 0.868 | 1.38   | 94.26  | 205.00 | 62.90  | 45.98  |
| DOK7 | 28 | 1.21 | Female | 8.42  | 0.718 | 0.975 | 1.38   | 106.14 | 205.00 | 70.65  | 51.78  |
| DOK7 | 28 | 1.20 | Female | 8.67  | 1.038 | 1.217 | 1.38   | 144.58 | 205.00 | 88.19  | 70.52  |
| DOK7 | 28 | 1.20 | Female | 8.67  | 1.056 | 1.247 | 1.38   | 134.32 | 205.00 | 90.36  | 65.52  |
| DOK7 | 28 | 1.22 | Female | 8.67  | 1.046 | 1.267 | 1.38   | 114.73 | 205.00 | 91.81  | 55.96  |
| DOK7 | 28 | 1.24 | Female | 9.25  | 1.019 | 1.317 | 1.38   | 72.50  | 230.00 | 95.43  | 31.52  |
| DOK7 | 28 | 1.26 | Female | 9.67  | 0.926 | 1.341 | 1.38   | 105.29 | 230.00 | 97.17  | 45.78  |
| DOK7 | 28 | 1.27 | Female | 9.75  | 1.258 | 1.461 | 1.59   | 146.57 | 230.00 | 91.89  | 63.73  |
| DOK7 | 28 | 1.28 | Female | 10.17 | 1.081 | 1.480 | 1.59   | 102.24 | 254.00 | 93.08  | 40.25  |
| DOK7 | 28 | 1.28 | Female | 10.17 | 1.186 | 1.513 | 1.59   | 120.41 | 254.00 | 95.16  | 47.41  |
| DOK7 | 28 | 1.28 | Female | 10.67 | 1.067 | 1.410 | 1.59   | 103.40 | 254.00 | 88.68  | 40.71  |
| DOK7 | 28 | 1.30 | Female | 10.67 | 1.137 | 1.483 | 1.59   | 107.71 | 254.00 | 93.27  | 42.40  |
| DOK7 | 28 | 1.30 | Female | 10.67 | 1.324 | 1.544 | 1.59   | 133.78 | 254.00 | 97.11  | 52.67  |
| DOK7 | 28 | 1.48 | Female | 14.25 | 1.644 | 2.055 | 2.38   | 197.34 | 351.00 | 86.34  | 56.22  |

|       |    |      |        |       |       |       |        |        |        |        |       |
|-------|----|------|--------|-------|-------|-------|--------|--------|--------|--------|-------|
| DOK7  | 28 | 1.49 | Female | 15.50 | 1.691 | 2.091 | 2.65   | 203.34 | 351.00 | 78.91  | 57.93 |
| DOK7  | 28 | 1.49 | Female | 15.50 | 1.691 | 2.091 | 2.65   | 203.34 | 351.00 | 78.91  | 57.93 |
| DOK7  | 28 | 1.50 | Female | 16.17 | 1.918 | 2.163 | 2.65   | 229.08 | 351.00 | 81.62  | 65.26 |
| DOK7  | 28 | 1.50 | Female | 16.17 | 1.918 | 2.163 | 2.65   | 229.08 | 351.00 | 81.62  | 65.26 |
| DOK7  | 28 | 1.50 | Female | 16.17 | 1.941 | 2.251 | 2.65   | 215.34 | 351.00 | 84.94  | 61.35 |
| DOK7  | 28 | 1.50 | Female | 16.17 | 1.941 | 2.251 | 2.65   | 215.34 | 351.00 | 84.94  | 61.35 |
| CHRNE | 13 | 1.44 | Female | 9.75  | 1.456 | 1.525 | 2.38   | 158.07 | 327.00 | 64.08  | 48.34 |
| CHRNE | 13 | 1.44 | Female | 9.75  | 1.456 | 1.525 | 2.38   | 158.07 | 327.00 | 64.08  | 48.34 |
| CHRNE | 13 | 1.47 | Female | 10.17 | 1.589 | 1.680 | 2.38   | 188.02 | 327.00 | 70.59  | 57.50 |
| CHRNE | 13 | 1.47 | Female | 10.17 | 1.589 | 1.680 | 2.38   | 188.02 | 327.00 | 70.59  | 57.50 |
| CHRNE | 13 | 1.47 | Female | 10.17 | 1.589 | 1.680 | 2.38   | 188.02 | 327.00 | 70.59  | 57.50 |
| CHRNE | 13 | 1.47 | Female | 10.17 | 1.589 | 1.680 | 2.38   | 188.02 | 327.00 | 70.59  | 57.50 |
| CHRNE | 13 | 1.54 | Female | 11.00 | 1.845 | 1.966 | 2.65   | 203.40 | 375.00 | 74.19  | 54.24 |
| CHRNE | 13 | 1.54 | Female | 11.00 | 1.845 | 1.966 | 2.65   | 203.40 | 375.00 | 74.19  | 54.24 |
| CHRNE | 13 | 1.58 | Female | 11.67 | 1.927 | 2.009 | 2.98   | 226.20 | 399.00 | 67.42  | 56.69 |
| CHRNE | 13 | 1.59 | Female | 12.33 | 2.223 | 2.292 | 2.98   | 291.84 | 399.00 | 76.91  | 73.14 |
| CHRNE | 13 | 1.62 | Female | 14.17 | 2.317 | 2.435 | 3.47   | 321.84 | 399.00 | 70.17  | 80.66 |
| DOK7  | 16 | 1.12 | Male   | 5.75  | 0.762 | 0.874 | #NULL! | 78.06  | 147.00 | #NULL! | 53.10 |
| CHRNE | 22 | 1.26 | Male   | 7.58  | 1.311 | 1.434 | 1.55   | 133.04 | 231.00 | 92.52  | 57.59 |
| CHRNE | 22 | 1.39 | Male   | 10.08 | 1.649 | 1.785 | 2.06   | 236.02 | 315.00 | 86.65  | 74.93 |
| CHRNE | 22 | 1.44 | Male   | 11.25 | 1.714 | 1.933 | 2.36   | 236.58 | 343.00 | 81.91  | 68.97 |
| CHRNE | 22 | 1.50 | Male   | 12.42 | 1.856 | 2.140 | 2.64   | 255.18 | 371.00 | 81.06  | 68.78 |
| COLQ  | 24 | 1.49 | Male   | 11.42 | 2.290 | 2.471 | 2.87   | 199.50 | 371.00 | 86.10  | 53.77 |
| RPSN  | 26 | 1.13 | Female | 6.67  | 0.955 | 1.021 | #NULL! | 108.41 | 181.00 | #NULL! | 59.90 |
| RPSN  | 26 | 1.16 | Female | 7.25  | 1.059 | 1.146 | 1.25   | 142.45 | 181.00 | 91.68  | 78.70 |
| RPSN  | 26 | 1.22 | Female | 8.25  | 1.227 | 1.356 | 1.38   | 156.14 | 205.00 | 98.26  | 76.17 |
| RPSN  | 26 | 1.27 | Female | 9.33  | 1.362 | 1.527 | 1.86   | 147.12 | 230.00 | 82.10  | 63.97 |
| RPSN  | 26 | 1.47 | Female | 13.08 | 2.191 | 2.435 | 2.78   | 288.18 | 327.00 | 87.59  | 88.13 |
| RPSN  | 26 | 1.47 | Female | 13.08 | 2.191 | 2.435 | 2.78   | 288.18 | 327.00 | 87.59  | 88.13 |
| RPSN  | 26 | 1.48 | Female | 14.00 | 2.132 | 2.575 | 2.78   | 333.60 | 351.00 | 92.63  | 95.04 |

|      |    |      |        |       |       |       |        |        |        |        |       |
|------|----|------|--------|-------|-------|-------|--------|--------|--------|--------|-------|
| RPSN | 26 | 1.48 | Female | 14.00 | 2.132 | 2.575 | 2.78   | 333.60 | 351.00 | 92.63  | 95.04 |
| RPSN | 26 | 1.44 | Female | 12.25 | 1.939 | 2.148 | 2.38   | 275.16 | 327.00 | 90.25  | 84.15 |
| RPSN | 26 | 1.44 | Female | 12.25 | 1.939 | 2.148 | 2.38   | 275.16 | 327.00 | 90.25  | 84.15 |
| RPSN | 27 | 1.26 | Female | 7.83  | 1.290 | 1.527 | 1.61   | 151.11 | 230.00 | 94.84  | 65.70 |
| RPSN | 27 | 1.50 | Female | 12.00 | 1.986 | 2.349 | 2.65   | 252.53 | 351.00 | 88.64  | 71.95 |
| RPSN | 27 | 1.50 | Female | 12.00 | 1.986 | 2.349 | 2.65   | 252.53 | 351.00 | 88.64  | 71.95 |
| RPSN | 27 | 1.63 | Female | 13.92 | 2.375 | 2.931 | 3.47   | 307.62 | 424.00 | 84.47  | 72.55 |
| RPSN | 27 | 1.65 | Female | 14.92 | 2.756 | 3.166 | 3.88   | 318.00 | 424.00 | 81.60  | 75.00 |
| RPSN | 27 | 1.66 | Female | 15.42 | 2.747 | 3.212 | 3.88   | 339.24 | 424.00 | 82.78  | 80.01 |
| SCS  | 30 | 1.03 | Male   | 4.50  | 0.393 | 0.393 | #NULL! | 63.60  | 91.00  | #NULL! | 69.89 |
| SCS  | 30 | 1.24 | Male   | 7.83  | 1.241 | 1.405 | 1.69   | 176.34 | 231.00 | 83.14  | 76.34 |
| SCS  | 30 | 1.30 | Male   | 8.75  | 1.341 | 1.648 | 1.97   | 165.18 | 259.00 | 83.65  | 63.78 |
| SCS  | 30 | 1.36 | Male   | 9.67  | 1.569 | 1.898 | 2.23   | 225.90 | 287.00 | 85.11  | 78.71 |

**Table 3:**

Cardiorespiratory sleep study data from the cohort of Congenital Myasthenic Syndrome patients.

- tCO<sub>2</sub> – transcutaneous carbon dioxide
- ODI – Oxygen Desaturation Index
- AHI – Apnoea/hypopnoea index

| ID   | Age at Study | Genotype | Mean tCO <sub>2</sub> | ODI | AHI  |
|------|--------------|----------|-----------------------|-----|------|
| 1.00 | 1.17         | CHRNE    | 39                    | 4   | 1.6  |
| 4.00 | 1.92         | COLQ     | 39                    | 1   | 0.5  |
| 4.00 | 3.17         | COLQ     | 43                    | 0   | 0.1  |
| 5.00 | 3.75         | COLQ     | 41                    | 15  | 11.1 |
| 5.00 | 4.92         | COLQ     | 42                    | 3   | 0.8  |
| 6.00 | 9.92         | COLQ     | 41                    | 3   | 1.8  |
| 6.00 | 10.92        | COLQ     | 45                    | 1   | 1.1  |

|       |       |         |    |    |      |
|-------|-------|---------|----|----|------|
| 6.00  | 12.25 | COLQ    | 45 | 2  | 1.2  |
| 6.00  | 13.20 | COLQ    | 45 | 2  | 1.0  |
| 8.00  | 5.25  | COL13A1 | 40 | 21 | 7.4  |
| 10.00 | 12.08 | COLQ    | 45 | 6  | 2.4  |
| 10.00 | 13.08 | COLQ    | 48 | 8  | 6.7  |
| 10.00 | 15.92 | COLQ    | 42 | 29 | 8.7  |
| 13.00 | 8.58  | CHRNE   | 40 | 0  | 0.0  |
| 14.00 | 3.25  | COLQ    | 43 | 2  | 1.0  |
| 14.00 | 5.08  | COLQ    | 42 | 1  | 0.7  |
| 14.00 | 6.67  | COLQ    | 45 | 0  | 0.1  |
| 14.00 | 8.75  | COLQ    | 45 | 3  | 0.0  |
| 15.00 | 0.17  | CHRNG   | 75 | 26 | 8.8  |
| 15.00 | 0.17  | CHRNG   | 66 | 9  | 3.9  |
| 15.00 | 0.25  | CHRNG   | 62 | 45 | 8.8  |
| 15.00 | 0.33  | CHRNG   | 61 | 6  | 3.1  |
| 15.00 | 0.83  | CHRNG   | 62 | 8  | 2.2  |
| 15.00 | 0.92  | CHRNG   | 64 | 23 | 6.9  |
| 15.00 | 0.92  | CHRNG   | 55 | 30 | 10.5 |
| 15.00 | 1.17  | CHRNG   | 58 | 12 | 2.4  |
| 15.00 | 1.83  | CHRNG   | 51 | 13 | 2.1  |
| 15.00 | 2.25  | CHRNG   | 53 | 11 | 2.4  |
| 15.00 | 2.58  | CHRNG   | 47 | 18 | 1.2  |
| 15.00 | 3.08  | CHRNG   | 59 | 17 | 5.4  |
| 15.00 | 3.58  | CHRNG   | 52 | 6  | 4.6  |
| 15.00 | 4.08  | CHRNG   | 56 | 8  | 3.9  |
| 15.00 | 4.67  | CHRNG   | 54 | 9  | 2.2  |
| 15.00 | 5.75  | CHRNG   | 55 | 7  | 2.7  |
| 15.00 | 6.67  | CHRNG   | 50 | 10 | 2.9  |
| 15.00 | 8.06  | CHRNG   | 50 | 5  | 1.6  |
| 15.00 | 8.06  | CHRNG   | 51 | 6  | 1.9  |

|       |       |       |    |    |        |
|-------|-------|-------|----|----|--------|
| 15.00 | 8.44  | CHRNA | 51 | 3  | 0.1    |
| 15.00 | 8.44  | CHRNA | 54 | 10 | 2.7    |
| 17.00 | 15.33 | DOK7  | 51 | 13 | 10.8   |
| 17.00 | 15.42 | DOK7  | 48 | 3  | 1.5    |
| 17.00 | 15.42 | DOK7  | 50 | 4  | 0.9    |
| 17.00 | 15.67 | DOK7  | 38 | 8  | 4.6    |
| 17.00 | 16.42 | DOK7  | 37 | 0  | 0.0    |
| 18.00 | 0.75  | DOK7  | 47 | 3  | 0.7    |
| 18.00 | 1.17  | DOK7  | 46 | 19 | 7.5    |
| 18.00 | 1.50  | DOK7  | 46 | 21 | 10.7   |
| 18.00 | 1.75  | DOK7  | 50 | 20 | 12.5   |
| 18.00 | 1.83  | DOK7  | 46 | 32 | 2.4    |
| 18.00 | 2.25  | DOK7  | 45 | 3  | 0.4    |
| 18.00 | 2.75  | DOK7  | 47 | 8  | 0.0    |
| 18.00 | 4.25  | DOK7  | 51 | 27 | 1.5    |
| 18.00 | 5.00  | DOK7  | 35 | 18 | 0.2    |
| 18.00 | 5.75  | DOK7  | 77 | 59 | 0.1    |
| 18.00 | 6.83  | DOK7  | 54 | 1  | 0.4    |
| 18.00 | 7.33  | DOK7  | 69 | 17 | 0.0    |
| 18.00 | 7.58  | DOK7  | 56 | 13 | #NULL! |
| 18.00 | 7.58  | DOK7  | 41 | 0  | 0.0    |
| 18.00 | 7.92  | DOK7  | 55 | 3  | 0.0    |
| 18.00 | 8.83  | DOK7  | 50 | 28 | 13.1   |
| 18.00 | 9.58  | DOK7  | 44 | 8  | 0.0    |
| 21.00 | 10.33 | DOK7  | 50 | 5  | 4.1    |
| 21.00 | 12.25 | DOK7  | 49 | 6  | 1.3    |
| 21.00 | 13.08 | DOK7  | 46 | 5  | 2.3    |
| 21.00 | 14.42 | DOK7  | 40 | 5  | 1.4    |
| 21.00 | 15.83 | DOK7  | 48 | 3  | 2.4    |
| 23.00 | 7.83  | DOK7  | 43 | 0  | 0.3    |

|       |       |      |        |    |     |
|-------|-------|------|--------|----|-----|
| 23.00 | 13.50 | DOK7 | 45     | 0  | 0.3 |
| 28.00 | 9.00  | DOK7 | 46     | 3  | 2.1 |
| 28.00 | 10.00 | DOK7 | 47     | 3  | 2.3 |
| 28.00 | 11.17 | DOK7 | 49     | 7  | 2.3 |
| 28.00 | 12.58 | DOK7 | 44     | 3  | 1.7 |
| 29.00 | 9.92  | RPSN | 46     | 7  | 0.8 |
| 29.00 | 11.00 | RPSN | 43     | 0  | 0.0 |
| 29.00 | 12.08 | RPSN | 48     | 0  | 0.0 |
| 29.00 | 13.08 | RPSN | 46     | 0  | 0.1 |
| 29.00 | 14.17 | RPSN | 38     | 0  | 0.0 |
| 29.00 | 15.08 | RPSN | 40     | 0  | 0.0 |
| 29.00 | 16.42 | RPSN | 40     | 0  | 0.0 |
| 30.00 | 10.75 | SCS  | 47     | 4  | 2.2 |
| 30.00 | 12.08 | SCS  | 45     | 5  | 3.3 |
| 31.00 | 15.67 | RPSN | 50     | 2  | 1.1 |
| 31.00 | 16.33 | RPSN | 36     | 1  | 0.3 |
| 31.00 | 17.42 | RPSN | 50     | 0  | 0.0 |
| 32.00 | 11.50 | COLQ | 49     | 3  | 0.3 |
| 32.00 | 12.00 | COLQ | 46     | 1  | 0.1 |
| 32.00 | 13.08 | COLQ | 46     | 5  | 3.3 |
| 32.00 | 14.08 | COLQ | #NULL! | 1  | 0.0 |
| 32.00 | 14.75 | COLQ | 49     | 0  | 0.0 |
| 32.00 | 15.75 | COLQ | 52     | 2  | 0.0 |
| 32.00 | 16.83 | COLQ | 39     | 0  | 0.0 |
| 33.00 | 16.83 | DOK7 | 57     | 11 | 8.4 |
| 33.00 | 17.08 | DOK7 | 54     | 11 | 3.6 |
| 33.00 | 17.08 | DOK7 | 54     | 8  | 2.5 |
| 33.00 | 17.33 | DOK7 | 51     | 1  | 1.4 |
| 33.00 | 17.75 | DOK7 | 49     | 1  | 0.6 |
| 33.00 | 18.08 | DOK7 | 48     | 4  | 2.8 |
